# Supplementary material for: Translation in Giant Viruses: A Unique Mixture of Bacterial and Eukaryotic Termination Schemes
Source: PLOS journal article supplement (doi:10.1371/journal.pgen.1003122), 2012-12-13

**A**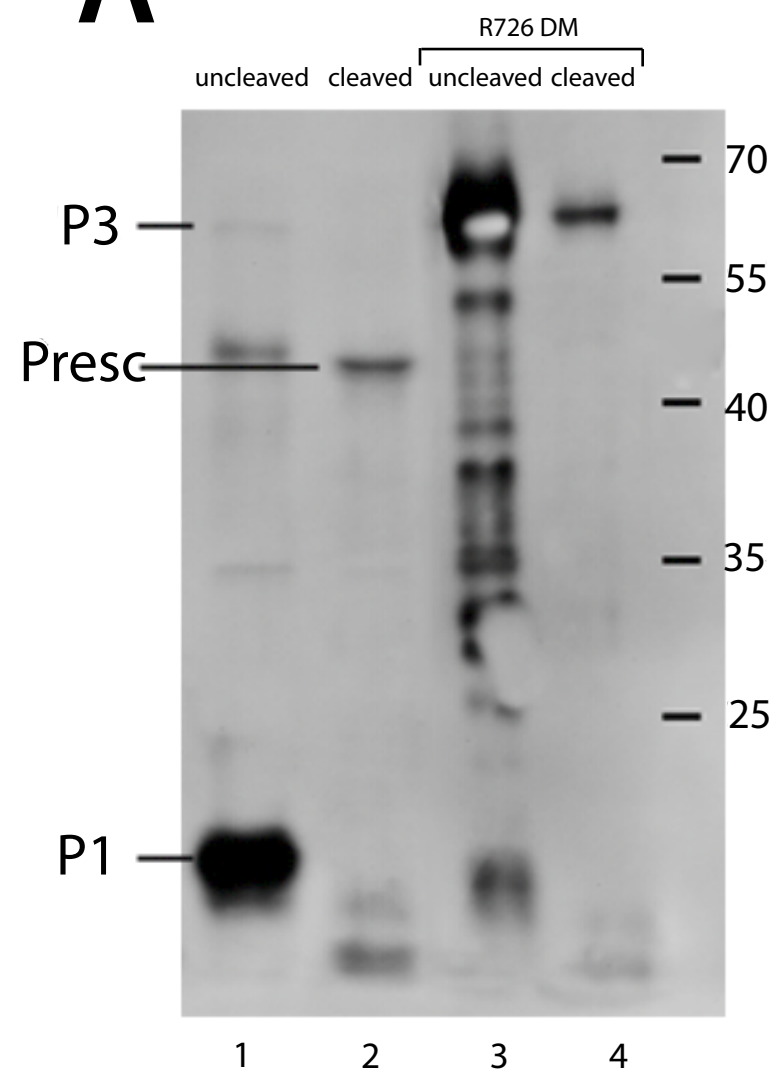**B**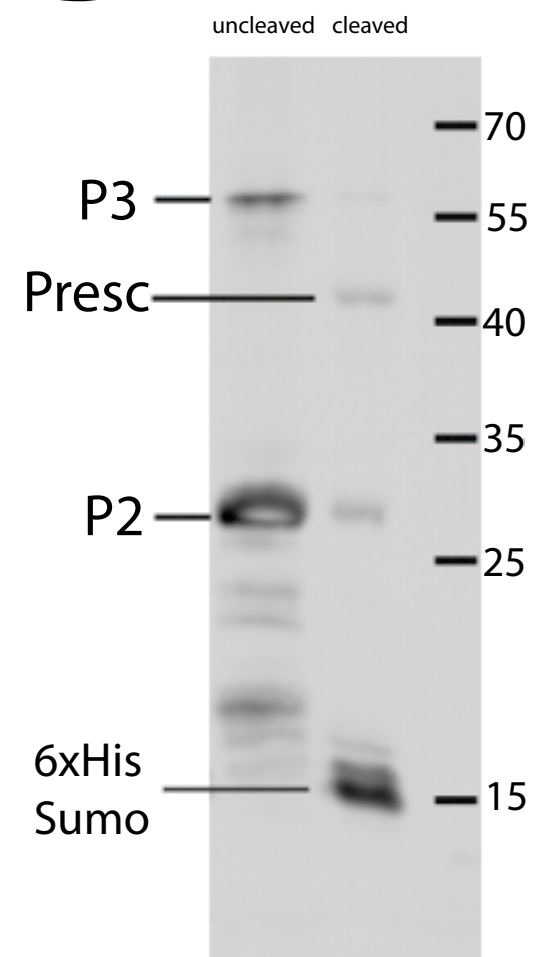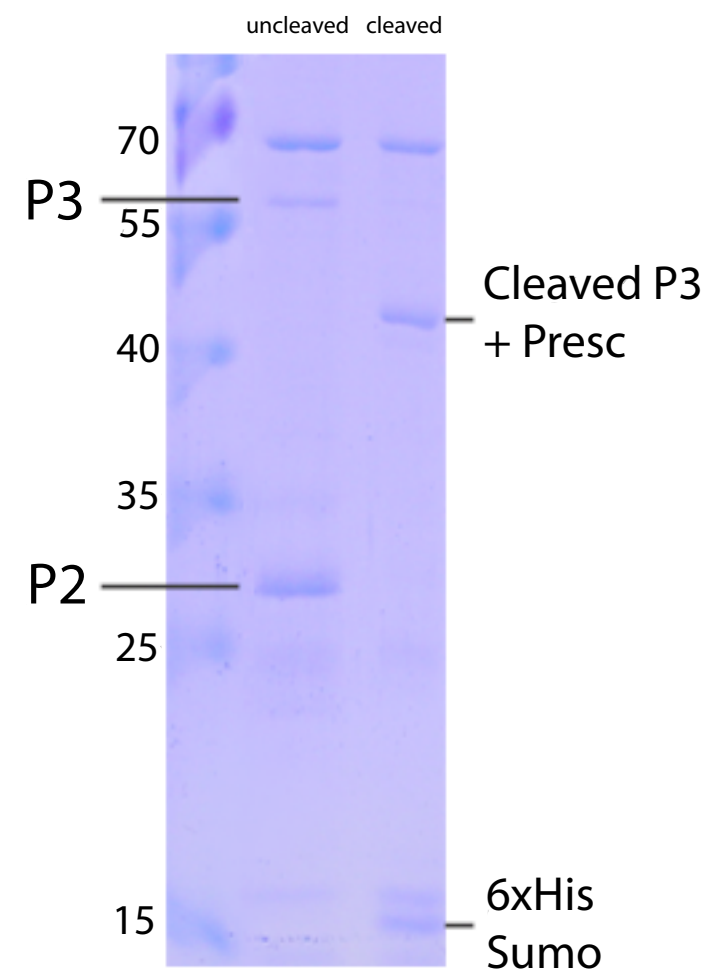**C**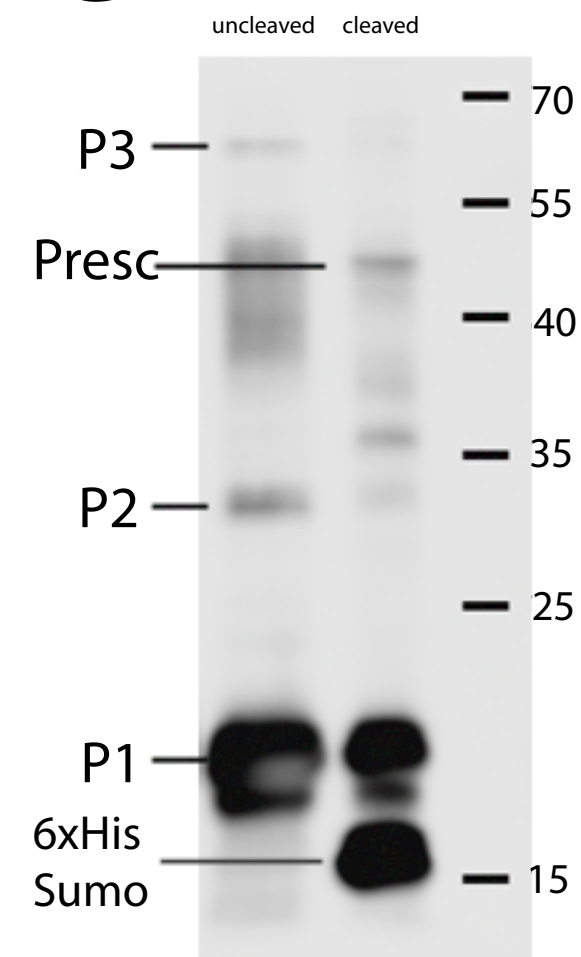

Supplement: S3 (10.1371/journal.pgen.1003122.s003) [file journal.pgen.1003122.s003]
